# Supplementary material
Source: publisher site journal article supplement (https://www.dovepress.com/article/438744)
Supplement: Supplementary file 1 [file get_supplementary_file.php]

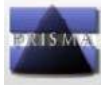

# Annex 1, PRISMA 2009 Checklist

| Section/topic                      | #  | Checklist item                                                                                                                                                                                                                                                                                              | Reported on page # |
|------------------------------------|----|-------------------------------------------------------------------------------------------------------------------------------------------------------------------------------------------------------------------------------------------------------------------------------------------------------------|--------------------|
| <b>TITLE</b>                       |    |                                                                                                                                                                                                                                                                                                             |                    |
| Title                              | 1  | Identify the report as a systematic review, meta-analysis, or both.                                                                                                                                                                                                                                         | Title page         |
| <b>ABSTRACT</b>                    |    |                                                                                                                                                                                                                                                                                                             |                    |
| Structured summary                 | 2  | Provide a structured summary including, as applicable: background; objectives; data sources; study eligibility criteria, participants, and interventions; study appraisal and synthesis methods; results; limitations; conclusions and implications of key findings; systematic review registration number. | Abstract           |
| <b>INTRODUCTION</b>                |    |                                                                                                                                                                                                                                                                                                             |                    |
| Rationale                          | 3  | Describe the rationale for the review in the context of what is already known.                                                                                                                                                                                                                              | 4-5                |
| Objectives                         | 4  | Provide an explicit statement of questions being addressed with reference to participants, interventions, comparisons, outcomes, and study design (PICOS).                                                                                                                                                  | 5-6                |
| <b>METHODS</b>                     |    |                                                                                                                                                                                                                                                                                                             |                    |
| Protocol and registration          | 5  | Indicate if a review protocol exists, if and where it can be accessed (e.g., Web address), and, if available, provide registration information including registration number.                                                                                                                               | 7                  |
| Eligibility criteria               | 6  | Specify study characteristics (e.g., PICOS, length of follow-up) and report characteristics (e.g., years considered, language, publication status) used as criteria for eligibility, giving rationale.                                                                                                      | 7                  |
| Information sources                | 7  | Describe all information sources (e.g., databases with dates of coverage, contact with study authors to identify additional studies) in the search and date last searched.                                                                                                                                  | 7-8                |
| Search                             | 8  | Present full electronic search strategy for at least one database, including any limits used, such that it could be repeated.                                                                                                                                                                               | 8-9                |
| Study selection                    | 9  | State the process for selecting studies (i.e., screening, eligibility, included in systematic review, and, if applicable, included in the meta-analysis).                                                                                                                                                   | 9                  |
| Data collection process            | 10 | Describe method of data extraction from reports (e.g., piloted forms, independently, in duplicate) and any processes for obtaining and confirming data from investigators.                                                                                                                                  | 10                 |
| Data items                         | 11 | List and define all variables for which data were sought (e.g., PICOS, funding sources) and any assumptions and simplifications made.                                                                                                                                                                       | 10-11              |
| Risk of bias in individual studies | 12 | Describe methods used for assessing risk of bias of individual studies (including specification of whether this was done at the study or outcome level), and how this information is to be used in any data synthesis.                                                                                      | 11                 |
| Summary measures                   | 13 | State the principal summary measures (e.g., risk ratio, difference in means).                                                                                                                                                                                                                               | 11-12              |
| Synthesis of results               | 14 | Describe the methods of handling data and combining results of studies, if done, including measures of consistency (e.g., $I^2$ ) for each meta-analysis.                                                                                                                                                   | 12                 |



# PRISMA 2009 Checklist

| Section/topic                 | #  | Checklist item                                                                                                                                                                                           | Reported on page # |
|-------------------------------|----|----------------------------------------------------------------------------------------------------------------------------------------------------------------------------------------------------------|--------------------|
| Risk of bias across studies   | 15 | Specify any assessment of risk of bias that may affect the cumulative evidence (e.g., publication bias, selective reporting within studies).                                                             | 13                 |
| Additional analyses           | 16 | Describe methods of additional analyses (e.g., sensitivity or subgroup analyses, meta-regression), if done, indicating which were pre-specified.                                                         | 11                 |
| <b>RESULTS</b>                |    |                                                                                                                                                                                                          |                    |
| Study selection               | 17 | Give numbers of studies screened, assessed for eligibility, and included in the review, with reasons for exclusions at each stage, ideally with a flow diagram.                                          | 13                 |
| Study characteristics         | 18 | For each study, present characteristics for which data were extracted (e.g., study size, PICOS, follow-up period) and provide the citations.                                                             | 13                 |
| Risk of bias within studies   | 19 | Present data on risk of bias of each study and, if available, any outcome level assessment (see item 12).                                                                                                | 13                 |
| Results of individual studies | 20 | For all outcomes considered (benefits or harms), present, for each study: (a) simple summary data for each intervention group (b) effect estimates and confidence intervals, ideally with a forest plot. | 14-15              |
| Synthesis of results          | 21 | Present results of each meta-analysis done, including confidence intervals and measures of consistency.                                                                                                  | 14-18              |
| Risk of bias across studies   | 22 | Present results of any assessment of risk of bias across studies (see Item 15).                                                                                                                          | 18                 |
| Additional analysis           | 23 | Give results of additional analyses, if done (e.g., sensitivity or subgroup analyses, meta-regression [see Item 16]).                                                                                    | 21-22              |
| <b>DISCUSSION</b>             |    |                                                                                                                                                                                                          |                    |
| Summary of evidence           | 24 | Summarize the main findings including the strength of evidence for each main outcome; consider their relevance to key groups (e.g., healthcare providers, users, and policy makers).                     | 18-27              |
| Limitations                   | 25 | Discuss limitations at study and outcome level (e.g., risk of bias), and at review-level (e.g., incomplete retrieval of identified research, reporting bias).                                            | 27                 |
| Conclusions                   | 26 | Provide a general interpretation of the results in the context of other evidence, and implications for future research.                                                                                  | 27-28              |
| <b>FUNDING</b>                |    |                                                                                                                                                                                                          |                    |
| Funding                       | 27 | Describe sources of funding for the systematic review and other support (e.g., supply of data); role of funders for the systematic review.                                                               | NA                 |

From: Moher D, Liberati A, Tetzlaff J, Altman DG, The PRISMA Group (2009). Preferred Reporting Items for Systematic Reviews and Meta-Analyses: The PRISMA Statement. PLoS Med 6(6): e1000097. doi:10.1371/journal.pmed1000097

For more information, visit: [www.prisma-statement.org](http://www.prisma-statement.org).

## **Annex 2, Search Strategy**

**The search date ends on October 1, 2022**

### **PubMed:**

#1 : "Hydrotherapy"[Title/Abstract] OR "whirlpool baths"[Title/Abstract] OR "bath whirlpool"[Title/Abstract] OR "baths whirlpool"[Title/Abstract] OR "whirlpool bath"[Title/Abstract] OR "watsu therapy"[Title/Abstract] OR "therapy watsu"[Title/Abstract] OR "water shiatsu"[Title/Abstract] OR (("acupressure"[MeSH Terms] OR "acupressure"[All Fields] OR "Shiatsu"[All Fields]) AND "Water"[Title/Abstract]) OR "WaterShiatsu"[Title/Abstract] OR "Balneology"[Title/Abstract] OR "Balneotherapy"[Title/Abstract] OR "hot springs"[Title/Abstract] OR "hot spring"[Title/Abstract] OR "spring hot"[Title/Abstract] OR "springs hot"[Title/Abstract] OR "warm springs"[Title/Abstract] OR "spring warm"[Title/Abstract] OR (("natural springs"[MeSH Terms] OR ("natural"[All Fields] AND "Springs"[All Fields]) OR "natural springs"[All Fields] OR "Springs"[All Fields] OR "Spring"[All Fields] OR "spring s"[All Fields] OR "springness"[All Fields]) AND "Warm"[Title/Abstract]) OR "warm spring"[Title/Abstract] OR "geothermal springs"[Title/Abstract] OR "geothermal spring"[Title/Abstract] OR "spring geothermal"[Title/Abstract]

**8297”**

#2: Low Back Pain[Title/Abstract] OR Back Pain, Low[Title/Abstract] OR Back Pains, Low[Title/Abstract] OR Low Back Pains[Title/Abstract] OR Pain, Low Back[Title/Abstract] OR Pains, Low Back[Title/Abstract] OR Lumbago[Title/Abstract] OR Lower Back Pain[Title/Abstract] OR Back Pain, Lower[Title/Abstract] OR Back Pains, Lower[Title/Abstract] OR Lower Back Pains[Title/Abstract] OR Pain, Lower Back[Title/Abstract] OR Pains, Lower Back[Title/Abstract] OR Low Back Ache[Title/Abstract] OR Ache, Low Back[Title/Abstract] OR Aches, Low Back[Title/Abstract] OR Back Ache, Low[Title/Abstract] OR Back Aches,

Low[Title/Abstract] OR Low Back Aches[Title/Abstract] OR Low Backache[Title/Abstract]  
OR Backache, Low[Title/Abstract] OR Backaches, Low[Title/Abstract] OR Low  
Backaches[Title/Abstract] OR Low Back Pain, Postural[Title/Abstract] OR Postural Low  
Back Pain[Title/Abstract] OR Low Back Pain, Posterior Compartment[Title/Abstract] OR  
Low Back Pain, Recurrent[Title/Abstract] OR Recurrent Low Back Pain[Title/Abstract] OR  
Low Back Pain, Mechanical[Title/Abstract] OR Mechanical Low Back Pain[Title/Abstract]  
OR Chronic Pain[Title/Abstract] OR Chronic Pains[Title/Abstract] OR Pains,  
Chronic[Title/Abstract] OR Pain, Chronic[Title/Abstract] OR Widespread Chronic  
Pain[Title/Abstract] OR Chronic Pain, Widespread[Title/Abstract] OR Chronic Pains,  
Widespread[Title/Abstract] OR Pain, Widespread Chronic[Title/Abstract] OR Pains,  
Widespread Chronic[Title/Abstract] OR Widespread Chronic Pains[Title/Abstract]

**94292”**

#3 : (Low Back Pain[Title/Abstract] OR Back Pain, Low[Title/Abstract] OR Back Pains,  
Low[Title/Abstract] OR Low Back Pains[Title/Abstract] OR Pain, Low Back[Title/Abstract]  
OR Pains, Low Back[Title/Abstract] OR Lumbago[Title/Abstract] OR Lower Back  
Pain[Title/Abstract] OR Back Pain, Lower[Title/Abstract] OR Back Pains,  
Lower[Title/Abstract] OR Lower Back Pains[Title/Abstract] OR Pain, Lower  
Back[Title/Abstract] OR Pains, Lower Back[Title/Abstract] OR Low Back  
Ache[Title/Abstract] OR Ache, Low Back[Title/Abstract] OR Aches, Low  
Back[Title/Abstract] OR Back Ache, Low[Title/Abstract] OR Back Aches,  
Low[Title/Abstract] OR Low Back Aches[Title/Abstract] OR Low Backache[Title/Abstract]  
OR Backache, Low[Title/Abstract] OR Backaches, Low[Title/Abstract] OR Low  
Backaches[Title/Abstract] OR Low Back Pain, Postural[Title/Abstract] OR Postural Low  
Back Pain[Title/Abstract] OR Low Back Pain, Posterior Compartment[Title/Abstract] OR  
Low Back Pain, Recurrent[Title/Abstract] OR Recurrent Low Back Pain[Title/Abstract] OR  
Low Back Pain, Mechanical[Title/Abstract] OR Mechanical Low Back Pain[Title/Abstract]  
OR Chronic Pain[Title/Abstract] OR Chronic Pains[Title/Abstract] OR Pains,  
Chronic[Title/Abstract] OR Pain, Chronic[Title/Abstract] OR Widespread Chronic  
Pain[Title/Abstract] OR Chronic Pain, Widespread[Title/Abstract] OR Chronic Pains,  
Widespread[Title/Abstract] OR Pain, Widespread Chronic[Title/Abstract] OR Pains,

Widespread Chronic[Title/Abstract] OR Widespread Chronic Pains[Title/Abstract]) AND  
(Hydrotherapy[Title/Abstract] OR Whirlpool Baths[Title/Abstract] OR Bath,  
Whirlpool[Title/Abstract] OR Baths, Whirlpool[Title/Abstract] OR Whirlpool  
Bath[Title/Abstract] OR Watsu Therapy[Title/Abstract] OR Therapy, Watsu[Title/Abstract]  
OR Water Shiatsu[Title/Abstract] OR Shiatsu, Water[Title/Abstract] OR  
WaterShiatsu[Title/Abstract] OR Balneology[Title/Abstract] OR Balneotherapy[Title/Abstract]  
OR Hot Springs[Title/Abstract] OR Hot Spring[Title/Abstract] OR Spring, Hot[Title/Abstract]  
OR Springs, Hot[Title/Abstract] OR Warm Springs[Title/Abstract] OR Spring,  
Warm[Title/Abstract] OR Springs, Warm[Title/Abstract] OR Warm Spring[Title/Abstract] OR  
Geothermal Springs[Title/Abstract] OR Geothermal Spring[Title/Abstract] OR Spring,  
Geothermal[Title/Abstract] OR Springs, Geotherma[Title/Abstract])

**104”**

**Web of science:**

#1:TS=(Low Back Pain or Back Pain, Low or Back Pains, Low or Low Back Pains or Pain, Low Back or Pains, Low Back or Lumbago or Lower Back Pain or Back Pain, Lower or Back Pains, Lower or Lower Back Pains or Pain, Lower Back or Pains, Lower Back or Low Back Ache or Ache, Low Back or Aches, Low Back or Back Ache, Low or Back Aches, Low or Low Back Aches or Low Backache or Backache, Low or Backaches, Low or Low Backaches or Low Back Pain, Postural or Postural Low Back Pain or Low Back Pain, Posterior Compartment or Low Back Pain, Recurrent or Recurrent Low Back Pain or Low Back Pain, Mechanical or Mechanical Low Back Pain or Chronic Pain or Chronic Pains or Pains, Chronic or Pain, Chronic or Widespread Chronic Pain or Chronic Pain, Widespread or Chronic Pains, Widespread or Pain, Widespread Chronic or Pains, Widespread Chronic or Widespread Chronic Pains)

**49084”**

#2:TS=(Hydrotherapy or Whirlpool Baths or Bath, Whirlpool or Baths, Whirlpool or Whirlpool Bath or Watsu Therapy or Therapy, Watsu or Water Shiatsu or Shiatsu, Water or WaterShiatsu or Balneology or Balneotherapy or Hot Springs or Hot Spring or Spring, Hot or Springs, Hot or Warm Springs or Spring, Warm or Springs, Warm or Warm Spring or Geothermal Springs or Geothermal Spring or Spring, Geothermal or Springs, Geotherma )

**7944”**

#3: #2 AND #1

**82”**

## **EMBASE**

#1:'low back pain':ab,ti OR 'back pain, low':ab,ti OR 'back pains, low':ab,ti OR 'low back pains':ab,ti OR 'pain, low back':ab,ti OR 'pains, low back':ab,ti OR lumbago:ab,ti OR 'lower back pain':ab,ti OR 'back pain, lower':ab,ti OR 'back pains, lower':ab,ti OR 'lower back pains':ab,ti OR 'pain, lower back':ab,ti OR 'pains, lower back':ab,ti OR 'low back ache':ab,ti OR 'ache, low back':ab,ti OR 'aches, low back':ab,ti OR 'back ache, low':ab,ti OR 'back aches, low':ab,ti OR 'low back aches':ab,ti OR 'low backache':ab,ti OR 'backache, low':ab,ti OR 'backaches, low':ab,ti OR 'low backaches':ab,ti OR 'low back pain, postural':ab,ti OR 'postural low back pain':ab,ti OR 'low back pain, posterior compartment':ab,ti OR 'low back pain, recurrent':ab,ti OR 'recurrent low back pain':ab,ti OR 'low back pain, mechanical':ab,ti OR 'mechanical low back pain':ab,ti OR 'chronic pain':ab,ti OR 'chronic pains':ab,ti OR 'pains, chronic':ab,ti OR 'pain, chronic':ab,ti OR 'widespread chronic pain':ab,ti OR 'chronic pain, widespread':ab,ti OR 'chronic pains, widespread':ab,ti OR 'pain, widespread chronic':ab,ti OR 'pains, widespread chronic':ab,ti OR 'widespread chronic pains':ab,ti

**11692”**

#2:

hydrotherapy:ab,ti OR 'whirlpool baths':ab,ti OR 'bath, whirlpool':ab,ti OR 'baths, whirlpool':ab,ti OR 'whirlpool bath':ab,ti OR 'watsu therapy':ab,ti OR 'therapy, watsu':ab,ti OR 'water shiatsu':ab,ti OR 'shiatsu, water':ab,ti OR watershiatsu:ab,ti OR balneology:ab,ti OR balneotherapy:ab,ti OR 'hot springs':ab,ti OR 'hot spring':ab,ti OR 'spring, hot':ab,ti OR 'springs, hot':ab,ti OR 'warm springs':ab,ti OR 'spring, warm':ab,ti OR 'springs, warm':ab,ti OR 'warm spring':ab,ti OR 'geothermal springs':ab,ti OR 'geothermal spring':ab,ti OR 'spring, geothermal':ab,ti OR 'springs, geotherma':ab,ti

**6884”**

#3:#1 AND #2

**149”**

## **Cochrane**

#1: (Low Back Pain or Back Pain, Low or Back Pains, Low or Low Back Pains or Pain, Low Back or Pains, Low Back or Lumbago or Lower Back Pain or Back Pain, Lower or Back Pains, Lower or Lower Back Pains or Pain, Lower Back or Pains, Lower Back or Low Back Ache or Ache, Low Back or Aches, Low Back or Back Ache, Low or Back Aches, Low or Low Back Aches or Low Backache or Backache, Low or Backaches, Low or Low Backaches or Low Back Pain, Postural or Postural Low Back Pain or Low Back Pain, Posterior Compartment or Low Back Pain, Recurrent or Recurrent Low Back Pain or Low Back Pain, Mechanical or Mechanical Low Back Pain or Chronic Pain or Chronic Pains or Pains, Chronic or Pain, Chronic or Widespread Chronic Pain or Chronic Pain, Widespread or Chronic Pains, Widespread or Pain, Widespread Chronic or Pains, Widespread Chronic or Widespread Chronic Pains):ti,ab,kw

**44327”**

#2: (Hydrotherapy or Whirlpool Baths or Bath, Whirlpool or Baths, Whirlpool or Whirlpool Bath or Watsu Therapy or Therapy, Watsu or Water Shiatsu or Shiatsu, Water or WaterShiatsu or Balneology or Balneotherapy or Hot Springs or Hot Spring or Spring, Hot or Springs, Hot or Warm Springs or Spring, Warm or Springs, Warm or Warm Spring or Geothermal Springs or Geothermal Spring or Spring, Geothermal or Springs, Geotherma):ti,ab,kw

**1174”**

#3: #1 AND #2

**165”**



## **EBSCO**

S1:SU Low Back Pain or Back Pain, Low or Back Pains, Low or Low Back Pains or Pain, Low Back or Pains, Low Back or Lumbago or Lower Back Pain or Back Pain, Lower or Back Pains, Lower or Lower Back Pains or Pain, Lower Back or Pains, Lower Back or Low Back Ache or Ache, Low Back or Aches, Low Back or Back Ache, Low or Back Aches, Low or Low Back Aches or Low Backache or Backache, Low or Backaches, Low or Low Backaches or Low Back Pain, Postural or Postural Low Back Pain or Low Back Pain, Posterior Compartment or Low Back Pain, Recurrent or Recurrent Low Back Pain or Low Back Pain, Mechanical or Mechanical Low Back Pain or Chronic Pain or Chronic Pains or Pains, Chronic or Pain, Chronic or Widespread Chronic Pain or Chronic Pain, Widespread or Chronic Pains, Widespread or Pain, Widespread Chronic or Pains, Widespread Chronic or Widespread Chronic Pains

**81677”**

S2:Hydrotherapy or Whirlpool Baths or Bath, Whirlpool or Baths, Whirlpool or Whirlpool Bath or Watsu Therapy or Therapy, Watsu or Water Shiatsu or Shiatsu, Water or WaterShiatsu or Balneology or Balneotherapy or Hot Springs or Hot Spring or Spring, Hot or Springs, Hot or Warm Springs or Spring, Warm or Springs, Warm or Warm Spring or Geothermal Springs or Geothermal Spring or Spring, Geothermal or Springs, Geotherma

**21362”**

S3:S1 AND S2

**35”**

### Annex 3 Subgroup Analysis for Each Outcome Measure

| intervention indicators       | analytical indicators         | subgroup             | No      | SMD/WMD       | 95%CI            | I <sup>2</sup> | P       | Weight  |        |
|-------------------------------|-------------------------------|----------------------|---------|---------------|------------------|----------------|---------|---------|--------|
| VAS                           |                               | Overall              | 21      | -0.901        | -1.777, -0.025   | 98.20%         | 0.044   | 100%    |        |
|                               |                               | NA                   | 4       | -0.561        | -0.852, -0.27    | 0%             | <0.0001 | 19.17%  |        |
|                               | age subgroups                 | ≥60                  | 10      | -1.452        | -1.857, -1.046   | 84%            | <0.0001 | 47.84%  |        |
|                               |                               | <60                  | 7       | -0.212        | -3.071, 2.648    | 99.40%         | 0.885   | 32.99%  |        |
|                               | intervention format subgroups | combination therapy  | 9       | -0.876        | -1.404, -0.349   | 89.60%         | 0.001   | 43.27%  |        |
|                               |                               | single hot spring hy | 10      | -1.006        | -1.396, -0.616   | 81.40%         | <0.0001 | 47.85%  |        |
|                               | country subgroups             | NA                   | 2       | -0.036        | -28.416, 28.344  | 99.90%         | 0.998   | 8.88%   |        |
|                               |                               | Turkey               | 11      | -0.722        | -2.463, 1.019    | 99.10%         | 0.416   | 52.15%  |        |
|                               |                               | Italy                | 3       | -2.012        | -2.628, -1.397   | 38.80%         | <0.0001 | 14.05%  |        |
|                               |                               |                      | Hungary | 7             | -0.670           | -0.979, -0.361 | 68%     | <0.0001 | 33.80% |
|                               | ODI/RMDQ                      |                      | Overall | 9             | -3.236           | -4.898, -1.575 | 98.40%  | <0.0001 | 100%   |
|                               |                               | NA                   | 1       | -0.325        | -0.920, 0.271    | 0              | 0.285   | 11.28%  |        |
| age subgroups                 |                               | ≥60                  | 6       | -1.515        | -2.163, -0.867   | 85.20%         | <0.0001 | 67.33%  |        |
|                               |                               | <60                  | 2       | -10.531       | -30.663, 9.602   | 99.80%         | 0.305   | 21.39%  |        |
| intervention format subgroups |                               | combination therapy  | 3       | -0.669        | -1.400, 0.062    | 81.50%         | 0.073   | 33.93%  |        |
|                               |                               | single hot spring hy | 5       | -1.574        | -2.409, -0.739   | 87.80%         | <0.0001 | 55.99%  |        |
| country subgroups             |                               | NA                   | 1       | -20.821       | -22.627, -19.016 |                | <0.0001 | 10.09%  |        |
|                               |                               | Turkey               | 4       | -5.532        | -9.615, -1.450   | 99.40%         | 0.008   | 44.01%  |        |
|                               |                               | Hungary              | 2       | -0.606        | -0.921, -0.290   | 0%             | <0.0001 | 22.69%  |        |
|                               |                               |                      | Italy   | 3             | -2.272           | -2.772, -1.773 | 0%      | <0.0001 | 33.30% |
| SF-36                         |                               |                      | Overall | 11            | 0.104            | -0.397, 0.606  | 86.30%  | 0.683   | 100%   |
|                               | age subgroups                 | ≥60                  | 9       | 0.231         | -0.353, 0.814    | 87.50%         | 0.439   | 81.63%  |        |
|                               |                               | NA                   | 2       | -0.449        | -1.189, 0.292    | 66.60%         | 0.235   | 18.37%  |        |
|                               | intervention format subgroups | combination therapy  | 3       | -0.825        | -1.683, 0.033    | 85.40%         | 0.001   | 27.96%  |        |
|                               |                               | single hot spring hy | 8       | 0.473         | 0.183, 0.764     | 39.60%         | 0.059   | 72.04%  |        |
|                               | country subgroups             | Italy                | 6       | 0.314         | -0.009, 0.636    | 26.10%         | 0.056   | 83.18%  |        |
|                               |                               | Turkey               | 3       | -0.825        | -1.683, 0.033    | 85.40%         | 0.059   | 27.96%  |        |
|                               |                               | Hungary              | 2       | 0.836         | 0.452, 1.220     | 0%             | <0.0001 | 18.86%  |        |
|                               | painkiller                    |                      | Overall | 6             | -0.471           | -0.922, -0.020 | 70.70%  | 0.041   | 100%   |
|                               |                               | age subgroups        | ≥60     | 1             | -0.018           | -0.538, 0.502  |         | 0.009   | 24.13% |
|                               |                               |                      | <60     | 5             | -0.619           | -1.085, -0.153 | 64.80%  | 0.945   | 75.87% |
| intervention format subgroups |                               | combination therapy  | 1       | -0.105        | -0.660, 0.450    |                | 0.031   | 23.10%  |        |
|                               |                               | single hot spring hy | 5       | -0.58         | -1.107, -0.053   | 73.60%         | 0.71    | 76.90%  |        |
| country subgroups             |                               | Hungary              | 5       | -0.580        | -1.107, -0.053   | 73.60%         | 0.031   | 76.90%  |        |
|                               | Turkey                        | 1                    | -0.105  | -0.660, 0.450 |                  | 0.71           | 23.10%  |         |        |
